# Supplementary material for: Soil bacterial community triggered by organic matter inputs supports a high-yielding pear production
Source: Copernicus journal article supplement (doi:10.5194/soil-2021-95), 2021-09-21
Supplement: Supplementary file [file soil-2021-95-AC4-supplement.zip]

1 Supporting Online Material for

2 **Soil bacterial community triggered by organic matter inputs**

3 **associates with a high-yielding pear production**

4

5 Li Wang<sup>1</sup>, Xiaomei Ye<sup>1</sup>✉, Hangwei Hu<sup>2</sup>, Jing Du<sup>1</sup>, Yonglan Xi<sup>1</sup>, Zongzhuan Shen<sup>3</sup>✉, Jing Lin<sup>4</sup>, Deli

6 Chen<sup>2</sup>

7

8 **Affiliations**

9 <sup>1</sup> Institute of Animal Science, Jiangsu Academy of Agricultural Sciences, Key Laboratory of Crop and

10 Livestock Integrated Farming, Ministry of Agriculture and Rural Affairs, Nanjing 210014, China

11 <sup>2</sup> Faculty of Veterinary and Agricultural Sciences, University of Melbourne, Melbourne, Victoria 3010,

12 Australia

13 <sup>3</sup> Jiangsu Provincial Key Lab of Solid Organic Waste Utilization, Jiangsu Collaborative Innovation

14 Center of Solid Organic Wastes, Educational Ministry Engineering Center of Resource-saving

15 fertilizers, The Key Laboratory of Plant Immunity, Nanjing Agricultural University, Nanjing, 210095,

16 China

17 <sup>4</sup> Institute of Pomology, Jiangsu Academy of Agricultural Sciences, Nanjing 210014, China

18

19 ✉ Corresponding author: Xiaomei Ye, Institute of Animal Science, Jiangsu Academy of Agricultural

20 Sciences, Key Laboratory of Crop and Livestock Integrated Farming, Ministry of Agriculture and Rural

21 Affairs, Nanjing 210014, China. Zognzhuan Shen, College of Resources and Environmental Sciences,

22 Nanjing Agricultural University, 210095, Nanjing, China. E-mail: shenzongz@njau.edu.cn. Tel:

23 (86)02584395521.

24

25

26

27

28

29

# Supplemental figures

**Fig. S1** Pie chart displaying the average composition of bacterial communities at the phylum level for all soil samples. Numbers in the pie chart represent the proportion of sequences affiliated to this phylum to all bacterial sequences.

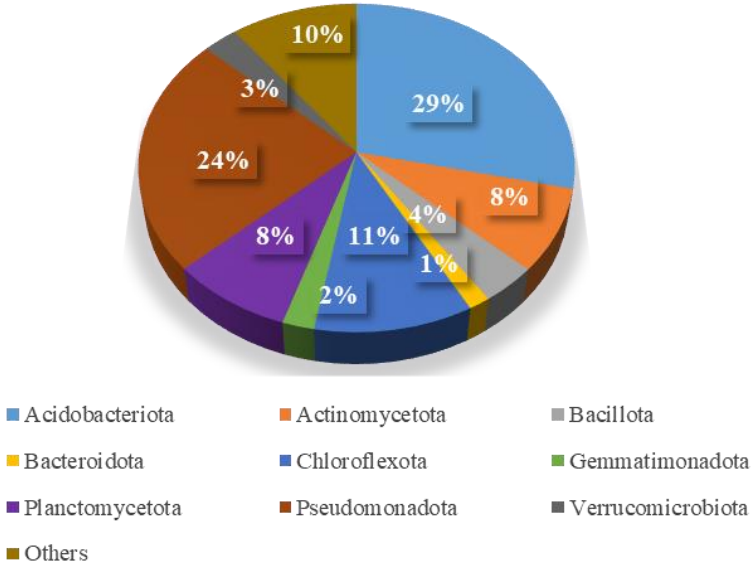

**Fig. S2** Boxplot showing the alpha diversity indices (Chao and Shannon) in yield-invigorating (YI) and yield-debilitating (YD) orchards of six pair-located orchards.

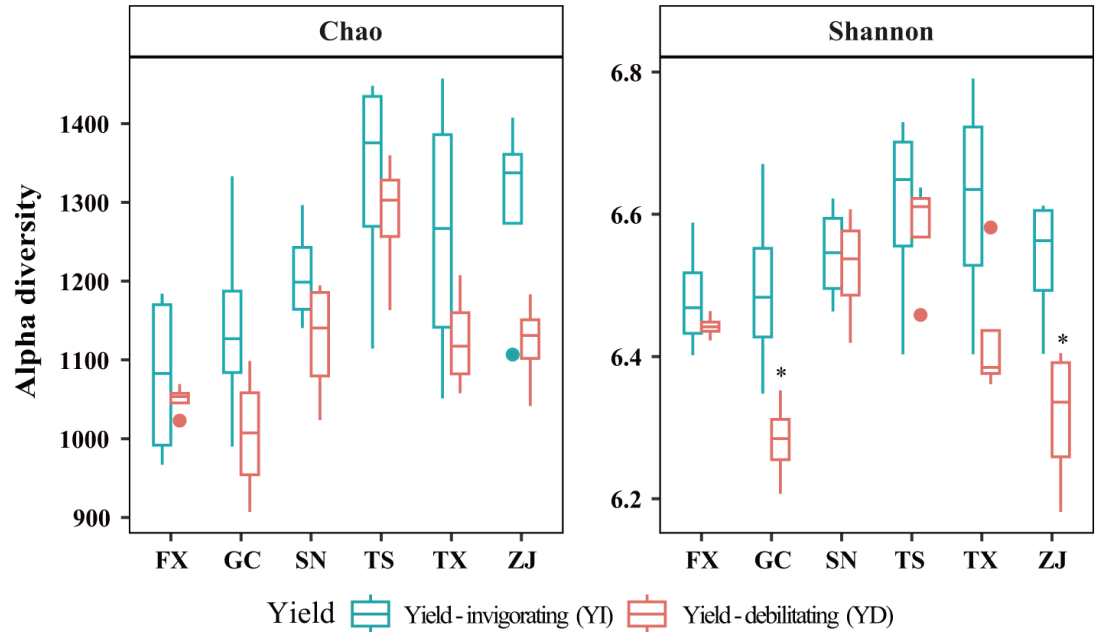

41 **Fig. S3** Venn plot showing the unique and shared bacterial ASVs between yield-invigorating (YI) and  
 42 yield-debilitating (YD) orchards for all six sites. Left panel is displaying the “responders”, which the  
 43 fold changes (log2 transformed) of ASVs was larger than 2 in each site in YI soils compared to those in  
 44 YD soils. Whereas, the right panel is displaying the “responders”, which the ASVs were unique in YI  
 45 soils for each site.

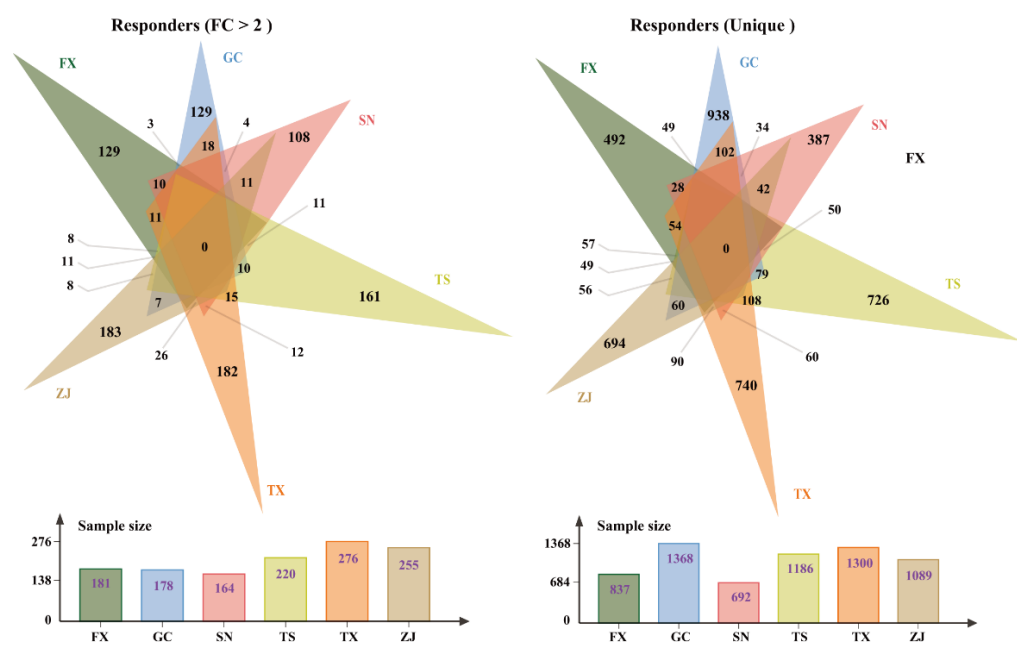

46  
 47  
 48  
 49 **Fig. S4** Violin plot showing the relative abundance of Bacteroidota, Chloroflexota and Planctomycetota  
 50 in yield-invigorating (YI) and yield-debilitating (YD) orchards. \* indicates a significant difference  
 51 between YI and YD soils based on Wilcoxon tests ( $p < 0.05$ ).

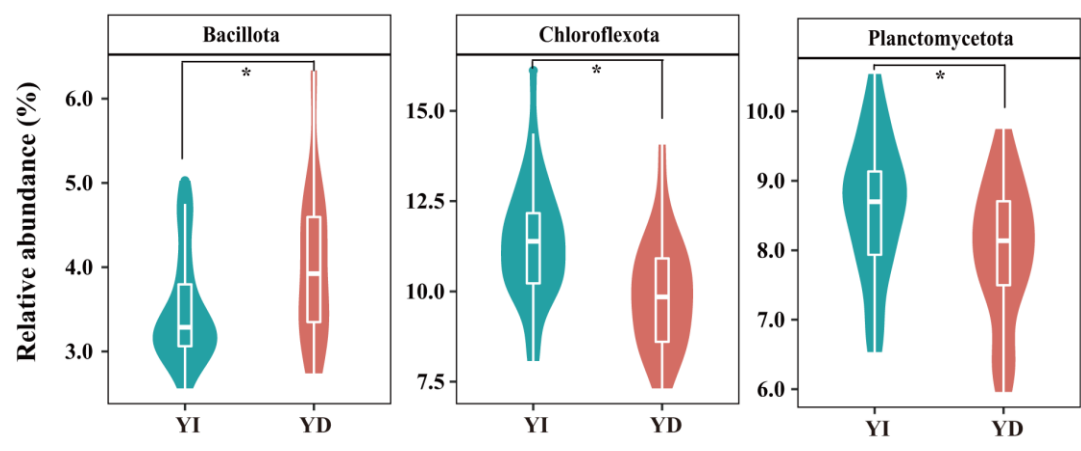

**Fig. S5** Genus-level taxonomic analysis of bacterial sequences obtained from yield-invigorating (YI) and yield-debilitating (YD) orchards using the STAMP software. Cyan bars represent the YI soils and pink bars represent the YD soils.

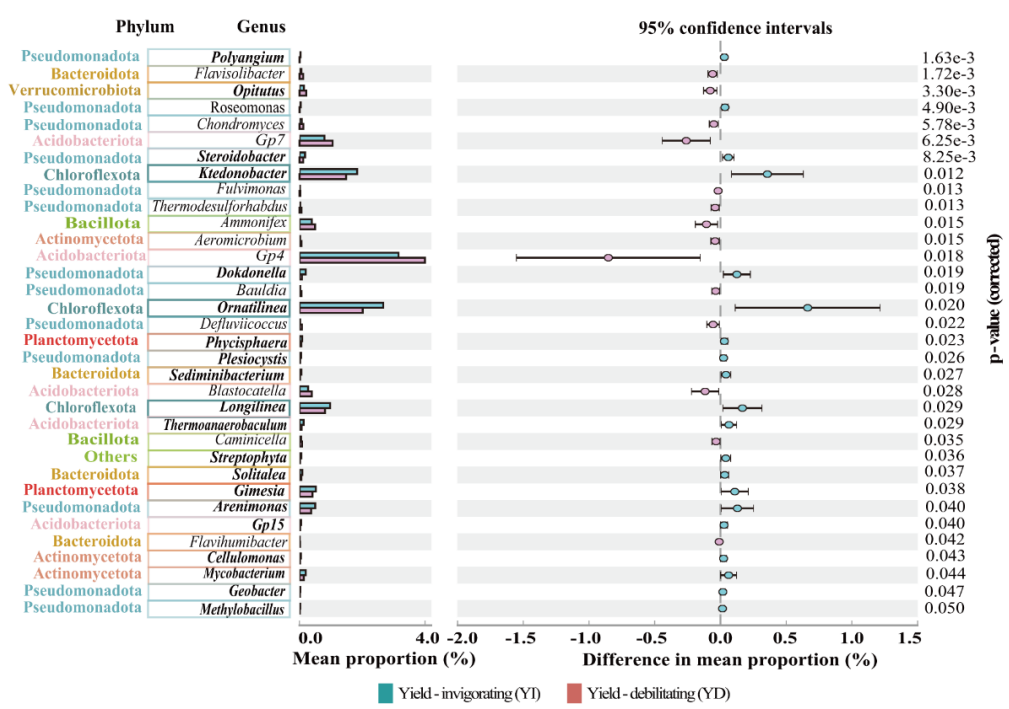

**Fig. S6** Conceptual model illustrating the biotic and abiotic factors in affecting the crop production.

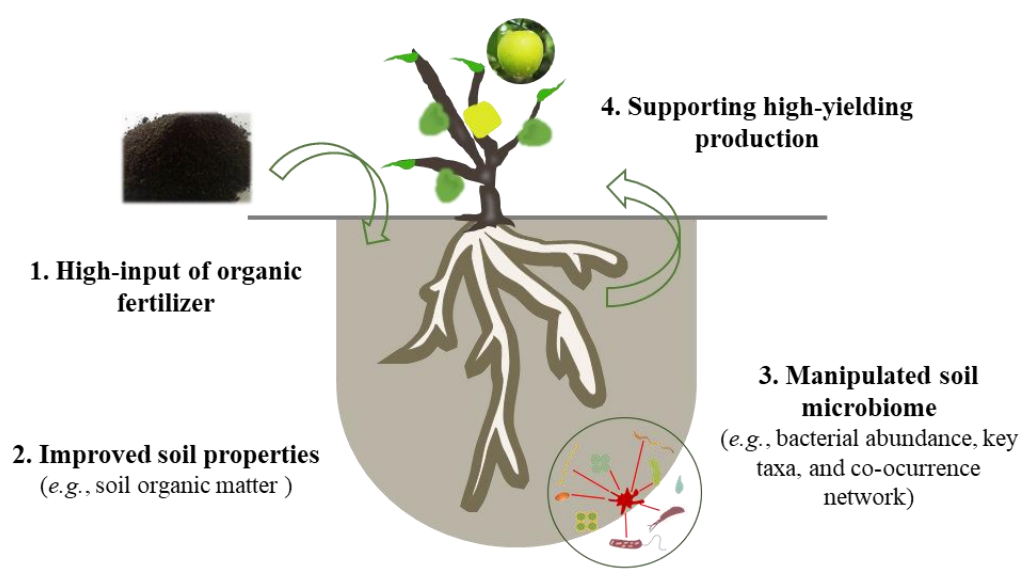

## Supplemental tables

**Table S1** Field site information of six pair-located orchards. YI and YD represent the orchards were yield-invigorating and yield-debilitating orchards, respectively. The relative increase of yield was calculated by as the following equation:  $(YI - YD) / YD \times 100\%$ .

| Sample ID | Locations | Administrative division          | Soil type        | Planting density | Cropping years | Orchard type | Yield (kg/tree) | Relative increase of yield (%) |
|-----------|-----------|----------------------------------|------------------|------------------|----------------|--------------|-----------------|--------------------------------|
| FX. YI    | FX        | Fengxian county, Xuzhou city     | Sandy soil       | 3 m × 5 m        | 3              | YI           | 10.0            | 49.2                           |
| FX. YD    |           |                                  |                  |                  | 3              | YD           | 6.7             |                                |
| GC. YI    | GC        | Gaochun county, Nanjing city     | Sandy loam       | 3 m × 5 m        | 20             | YI           | 37.5            | 25.0                           |
| GC. YD    |           |                                  |                  |                  | 20             | YD           | 30.0            |                                |
| SN. YI    | SN        | Suining county, Xuzhou city      | Sandy soil       | 1 m × 3 m        | 4              | YI           | 12.5            | 25.0                           |
| SN. YD    |           |                                  |                  |                  | 4              | YD           | 10.0            |                                |
| TS. YI    | TS        | Tongshan county, Xuzhou city     | Sandy soil       | 3 m × 5 m        | 4              | YI           | 12.5            | 25.0                           |
| TS. YD    |           |                                  |                  |                  | 4              | YD           | 10.0            |                                |
| TX. YI    | TX        | Taixing county, Taizhou city     | Fluvo-aquic soil | 3 m × 5 m        | 6              | YI           | 36.0            | 28.6                           |
| TX. YD    |           |                                  |                  |                  | 6              | YD           | 28.0            |                                |
| ZJ. YI    | ZJ        | Zhangjiagang county, Suzhou city | Loam soil        | 3 m × 5 m        | 15             | YI           | 27.5            | 10.0                           |
| ZJ. YD    |           |                                  |                  |                  | 9              | YD           | 25.0            |                                |

**Table S2** Fertilization information for each orchard sampled in this study. YI and YD represent the orchards were yield-invigorating and yield-debilitating orchards, respectively.

| Sample ID | location | N<br>(kg/tree) | P <sub>2</sub> O <sub>5</sub><br>(kg/tree) | K <sub>2</sub> O<br>(kg/tree) | Organic matter<br>(kg/tree) |
|-----------|----------|----------------|--------------------------------------------|-------------------------------|-----------------------------|
| FX. YI    | FX       | 0.80           | 0.80                                       | 1.00                          | 50                          |
| FX. YD    |          | 0.80           | 0.80                                       | 1.00                          | 25                          |
| GC. YI    | GC       | 0.40           | 0.40                                       | 0.80                          | 27.5                        |
| GC. YD    |          | 0.40           | 0.40                                       | 0.80                          | 15                          |
| SN. YI    | SN       | 0.45           | 0.45                                       | 0.45                          | 35                          |
| SN. YD    |          | 0.45           | 0.45                                       | 0.45                          | 20                          |
| TS. YI    | TS       | 0.75           | 0.75                                       | 0.75                          | 35                          |
| TS. YD    |          | 0.75           | 0.75                                       | 0.75                          | 15                          |
| TX. YI    | TX       | 0.45           | 0.60                                       | 0.45                          | 50                          |
| TX. YD    |          | 0.45           | 0.60                                       | 0.45                          | 25                          |
| ZJ. YI    | ZJG      | 0.55           | 0.55                                       | 0.55                          | 30                          |
| ZJ. YD    |          | 0.55           | 0.55                                       | 0.55                          | 15                          |

Notes: The amounts of N, P<sub>2</sub>O<sub>5</sub>, K<sub>2</sub>O displaying here are the total amounts of fertilizer applied into each orchard per season. The chemical fertilizers applied in each orchard are urea, superphosphate, potassium chloride, and compound fertilizer based on the farmer option. The type of organic matter applied for each orchard are also different. For yield-invigorating and yield-debilitating orchards in FX, SN, TS, TX, and ZJ, organic fertilizer was pig manure bought from local organic fertilizer companies. Meanwhile, for yield-invigorating and yield-debilitating orchards in GC, organic fertilizer was the mixture of chicken manure and rape seed cake.

80

81 **Table S3** Measured edaphic properties of sampled soils. \* indicates a significant difference between all YI and YD soils based on Wilcoxon tests ( $p < 0.05$ ).

| ID        | pH        | OM*<br>(g/kg) | N<br>(mg/Kg) | AP<br>(mg/Kg) | AK<br>(mg/Kg) | TN<br>(%)  | Ca<br>(g/Kg) | Mg<br>(mg/Kg) | Fe<br>(mg/Kg) | Mn<br>(mg/Kg) | Cu<br>(mg/Kg) | Zn<br>(mg/Kg) |
|-----------|-----------|---------------|--------------|---------------|---------------|------------|--------------|---------------|---------------|---------------|---------------|---------------|
| FX. YI    | 6.98±0.02 | 16.8±2.5      | 36.8±5.1     | 16±2          | 47±4          | 0.08±0.01  | 7.5±0.3      | 194±2         | 14.4±1.1      | 3.8±0.6       | 0.2±0.02      | 2.5±0.6       |
| FX. YD    | 6.96±0.05 | 12.5±1.0      | 24.4±2.7     | 19±2          | 47±3          | 0.06±0.01  | 8.6±0.2      | 196±16        | 2.1±0.3       | 3.2±0.3       | 0.1±0.01      | 2.1±0.3       |
| GC. YI    | 5.21±0.11 | 39.8±7.5      | 65.1±2.3     | 188±9         | 177±21        | 0.46±0.06  | 3.7±0.6      | 628±33        | 39.6±2.6      | 36.8±5.0      | 2.3±0.3       | 4.9±0.9       |
| GC. YD    | 5.24±0.09 | 28.4±1.7      | 76.6±3.8     | 96±3          | 134±20        | 0.31±0.07  | 3.2±0.7      | 265±21        | 49.2±6.4      | 49.4±4.3      | 2.4±0.4       | 6.1±0.5       |
| SN. YI    | 6.74±0.05 | 23.8±3.3      | 68.4±11.3    | 126±23        | 105±13        | 0.14±0.01  | 9.4±1.4      | 493±91        | 17.2±1.8      | 4.1±0.2       | 1.3±0.2       | 3.5±0.4       |
| SN. YD    | 6.78±0.05 | 20.7±3.6      | 66.5±6.5     | 167±15        | 119±17        | 0.13±0.02  | 8.5±0.7      | 454±66        | 16.7±2.4      | 4.5±0.5       | 1.6±0.3       | 4.0±0.6       |
| TS. YI    | 6.79±0.01 | 10.7±0.6      | 47.1±2.4     | 84±22         | 83±15         | 0.09±0.01  | 12.3±0.4     | 286±20        | 12.5±2.7      | 5.3±0.5       | 1.3±0.1       | 2.7±0.9       |
| TS. YD    | 7.18±0.32 | 9.0±1.5       | 35.5±7.3     | 12±3          | 27±4          | 0.07±0.01  | 12.8±0.3     | 386±39        | 9.9±1.8       | 3.6±0.2       | 1.6±0.4       | 2.2±0.6       |
| TX. YI    | 6.75±0.07 | 13.2±1.5      | 52.0±10.7    | 210±14        | 114±33        | 0.07±0.01  | 6.4±0.5      | 474±54        | 17.9±7.6      | 4.0±0.9       | 1.2±0.3       | 5.0±1.0       |
| TX. YD    | 6.98±0.21 | 11.8±0.6      | 44.4±2.9     | 82±12         | 176±19        | 0.09±0.002 | 3.9±0.3      | 399±26        | 17.8±2.6      | 2.7±0.7       | 0.75±0.12     | 2.8±0.1       |
| ZJ. YI    | 7.49±0.18 | 20.7±2.6      | 49.6±2.2     | 50±12         | 36±6          | 0.11±0.01  | 6.1±0.1      | 349±15        | 16.8±1.2      | 8.6±0.2       | 2.8±0.07      | 1.7±0.2       |
| ZJ. YD    | 6.92±0.06 | 17.9±1.8      | 71.6±8.0     | 130±22        | 65±13         | 0.28±0.03  | 5.2±0.5      | 513±46        | 16.3±0.9      | 10.1±0.8      | 2.55±0.21     | 2.5±0.7       |
| YI (Mean) | 6.66±0.72 | 20.8±10.3     | 53.2±12.5    | 112±73        | 94±50         | 0.16±0.14  | 7.6±2.8      | 404±152       | 19.7±9.8      | 10.4±12.3     | 1.5±0.9       | 3.4±1.4       |
| YD (Mean) | 6.68±0.68 | 16.7±6.9      | 53.1±20.5    | 84±58         | 95±55         | 0.16±0.11  | 7.0±3.4      | 369±115       | 18.7±15.2     | 12.3±17.3     | 1.5±0.9       | 3.3±1.5       |

82

83

84

85 **Table S4** Major topological properties of phylogenetic molecular ecological networks of soil bacterial  
 86 communities for yield-invigorating and yield-debilitating orchards.

| Network Indexes                                             | YI    | YD    |
|-------------------------------------------------------------|-------|-------|
| Network size                                                | 302   | 235   |
| Total links                                                 | 448   | 334   |
| No. of negative interactions                                | 160   | 105   |
| No. of positive interactions                                | 288   | 229   |
| Ratio of negative interactions to positive interactions (%) | 55.6  | 45.9  |
| R square of power-law                                       | 0.915 | 0.871 |
| Harmonic geodesic distance (HD)                             | 4.6   | 4.985 |
| Centralization of betweenness (CB)                          | 0.106 | 0.154 |
| No. of modules ( > 5 nodes)                                 | 11    | 9     |
| Average clustering coefficient (avgCC)                      | 0.152 | 0.131 |
| Average path distance (GD)                                  | 5.494 | 6.232 |
| Average degree (avgK)                                       | 2.967 | 2.843 |

87



88

89 **Table S5** The affiliations of keystone nodes identified in the networks constructed by yield-invigorating (YI) and yield-debilitating (YD) soils.

| Node ID | Network | Phylum                          | Genus                              | Function group |
|---------|---------|---------------------------------|------------------------------------|----------------|
| ASV26   | YI      | Acidobacteriota                 | <i>Gp6</i>                         | Module hubs    |
| ASV296  | YI      | Acidobacteriota                 | <i>Gp6</i>                         |                |
| ASV316  | YI      | Acidobacteriota                 | <i>Gaiella</i>                     |                |
| ASV6    | YD      | Acidobacteriota                 | <i>Gp6</i>                         |                |
| ASV23   | YD      | Acidobacteriota                 | <i>Gp6</i>                         |                |
| ASV64   | YD      | Acidobacteriota                 | <i>Gp17</i>                        |                |
| ASV66   | YD      | Acidobacteriota                 | <i>Acanthopleuribacter</i>         |                |
| ASV76   | YD      | Acidobacteriota                 | <i>Gp4</i>                         |                |
| ASV36   | YD      | Actinomycetota                  | <i>Arthrobacter</i>                |                |
| ASV126  | YD      | Pseudomonadota                  | <i>Povalibacter</i>                | Connectors     |
| ASV256  | YI      | Actinomycetota<br>Chloroflexota | <i>Phycococcus</i>                 |                |
| ASV357  | YI      |                                 | <i>Longilinea</i>                  |                |
| ASV115  | YI      | Others                          | <i>WPS-I_genera_incertae_sedis</i> |                |
| ASV425  | YI      | Pseudomonadota                  | <i>Andersenella</i>                |                |
| ASV155  | YD      | Acidobacteriota                 | <i>Gp6</i>                         |                |

90

91

92 **Table S6** Correlation coefficients (*R*) and *P* values between selected soil chemical properties in the

93 RDA analysis and bacterial community composition at the ASV level based on Mantel test.

|    | Mantel test |          |
|----|-------------|----------|
|    | <i>R</i>    | <i>P</i> |
| MN | 0.755       | 0.001    |
| TN | 0.580       | 0.001    |
| OM | 0.511       | 0.001    |
| Ca | 0.421       | 0.001    |
| AP | 0.148       | 0.003    |
| AK | 0.379       | 0.01     |
| N  | 0.268       | 0.001    |
| Cu | 0.372       | 0.001    |

94
